# Supplementary material for: MITF Contributes to the Body Color Differentiation of Sea Cucumbers Apostichopus japonicus through Expression Differences and Regulation of Downstream Genes
Source: MDPI journal article supplement (doi:10.3390/biology12010001), 2022-12-20
Supplement: s1 [file s1]

**Table S8** HOMER enrichment results for known motifs in white *A. japonicus*, compared with green *A. japonicus*.

| Rank | Motif                                                                               | Log ( <i>p</i> value) | Name                                                     |
|------|-------------------------------------------------------------------------------------|-----------------------|----------------------------------------------------------|
| 1    |    | -1.347e+01            | HRE(HSF)/Striatum-HSF1-ChIP-Seq(GSE38000)/Homer          |
| 2    |    | -1.092e+01            | THRa(NR)/C17.2-THRa-ChIP-Seq(GSE38347)/Homer             |
| 3    |    | -1.024e+01            | Stat3(Stat)/mES-Stat3-ChIP-Seq(GSE11431)/Homer           |
| 4    |    | -9.730e+00            | GEI-11(Myb?)/cElegans-L4-GEI11-ChIP-Seq(modEncode)/Homer |
| 5    |    | -8.971e+00            | Foxh1(Forkhead)/hESC-FOXH1-ChIP-Seq(GSE29422)/Homer      |
| 6    |  | -8.804e+00            | Elk4(ETS)/Hela-Elk4-ChIP-Seq(GSE31477)/Homer             |
| 7    |  | -8.179e+00            | FHY3(FAR1)/Arabidopsis-FHY3-ChIP-Seq(GSE30711)/Homer     |
| 8    |  | -7.943e+00            | Tbx20(T-box)/Heart-Tbx20-ChIP-Seq(GSE29636)/Homer        |
| 9    |  | -7.697e+00            | LXRE(NR),DR4/RAW-LXRb.biotin-ChIP-Seq(GSE21512)/Homer    |
| 10   |  | -7.189e+00            | Tcf3(HMG)/mES-Tcf3-ChIP-Seq(GSE11724)/Homer              |
| 11   |  | -6.747e+00            | Mef2b(MADS)/HEK293-Mef2b.V5-ChIP-Seq(GSE67450)/Homer     |
| 12   |  | -6.300e+00            | Tcf4(HMG)/Hct116-Tcf4-ChIP-Seq(SRA012054)/Homer          |
| 13   |  | -6.116e+00            | RAR:RXR(NR),DR5/ES-RAR-ChIP-Seq(GSE56893)/Homer          |

|    |  |            |                                                      |
|----|--|------------|------------------------------------------------------|
| 14 |  | -5.853e+00 | NF1(CTF)/LNCAP-NF1-ChIP-Seq(Unpublished)/Homer       |
| 15 |  | -5.752e+00 | HRE(HSF)/HepG2-HSF1-ChIP-Seq(GSE31477)/Homer         |
| 16 |  | -5.073e+00 | BMAL1(bHLH)/Liver-Bmal1-ChIP-Seq(GSE39860)/Homer     |
| 17 |  | -5.055e+00 | SFP1/SacCer-Promoters/Homer                          |
| 18 |  | -4.988e+00 | TR4(NR),DR1/Hela-TR4-ChIP-Seq(GSE24685)/Homer        |
| 19 |  | -4.933e+00 | PR(NR)/T47D-PR-ChIP-Seq(GSE31130)/Homer              |
| 20 |  | -4.925e+00 | PRDM1(Zf)/Hela-PRDM1-ChIP-Seq(GSE31477)/Homer        |
| 21 |  | -4.878e+00 | Fli1(ETS)/CD8-FLI-ChIP-Seq(GSE20898)/Homer           |
| 22 |  | -4.624e+00 | IRF:BATF(IRF:bZIP)/pDC-Irf8-ChIP-Seq(GSE66899)/Homer |
