# Supplementary material for: MITF Contributes to the Body Color Differentiation of Sea Cucumbers Apostichopus japonicus through Expression Differences and Regulation of Downstream Genes
Source: MDPI journal article supplement (doi:10.3390/biology12010001), 2022-12-20
Supplement: s1 [file s1]

**Table S7** HOMER enrichment results for known motifs in purple *A. japonicus*, compared with green *A. japonicus*.

| Rank | Motif                                                                               | Log ( <i>p</i> value) | Name                                                                  |
|------|-------------------------------------------------------------------------------------|-----------------------|-----------------------------------------------------------------------|
| 1    |    | -1.173e+01            | IRF:BATF(IRF:bZIP)/pDC-Irf8-ChIP-Seq(GSE66899)/Homer                  |
| 2    |    | -9.468e+00            | Nkx3.1(Homeobox)/LNCaP-Nkx3.1-ChIP-Seq(GSE28264)/Homer                |
| 3    |    | -9.079e+00            | LXRE(NR),DR4/RAW-LXRb.biotin-ChIP-Seq(GSE21512)/Homer                 |
| 4    |    | -7.664e+00            | RORgt(NR)/EL4-RORgt.Flag-ChIP-Seq(GSE56019)/Homer                     |
| 5    |    | -7.281e+00            | CRE(bZIP)/Promoter/Homer                                              |
| 6    |   | -6.645e+00            | NFkB-p65(RHD)/GM12787-p65-ChIP-Seq(GSE19485)/Homer                    |
| 7    |  | -6.378e+00            | RAR:RXR(NR),DR5/ES-RAR-ChIP-Seq(GSE56893)/Homer                       |
| 8    |  | -6.274e+00            | PR(NR)/T47D-PR-ChIP-Seq(GSE31130)/Homer                               |
| 9    |  | -5.540e+00            | HOXD13(Homeobox)/Chicken-Hoxd13-ChIP-Seq(GSE38910)/Homer              |
| 10   |  | -5.127e+00            | PAX5(Paired,Homeobox),condensed/GM12878-PAX5-ChIP-Seq(GSE32465)/Homer |
| 11   |  | -4.705e+00            | FOXA1:AR(Forkhead,NR)/LNCAP-AR-ChIP-Seq(GSE27824)/Homer               |
